# Supplementary material
Source: Research Square preprint supplement (doi:10.21203/rs.3.rs-9403964/v1)
Supplement: Supplementary file 1 [file 128c7945f66fec9d62c7be9e.docx]

**Additional File Legends**

**Additional File 1: Summary of the ‘min’ assay. (A)** Cartoon of binding sites on *KIT* exon 11 of primers used in the study and of PCR products from a wild-type (WT) exon 11, a Type I duplication (only the FminA binding site duplicated), a Type II duplication (both FminA and RminA binding sites duplicated) and a Type III duplication (only the RminA binding site duplicated). The positions of the minA (green), minB (yellow) and whole exon 11 (white) primers are indicated (block arrows). The PCR products from these primers are indicated below (boxes). The duplications are indicated in red as both the 5’ and 3’ duplicated sequences. Note that with the whole exon 11 and minB primers, a duplication results in only a single larger product being generated, so any WT amplified bands must come from WT *KIT* exon 11 template. However, for the minA primers with Type I, II and III ITDs, both WT and ITD fragments can be generated. **(B)** Examples of melt curve traces from the minA and minB assays. In the minA assays (upper) WT peaks are indicated with a black arrow, ITD peaks with a red arrow. In all cases, WT peaks have a similar Tm of 72 – 73oC. The Type I and III ITD peaks have a Tm of 78 – 79oC and the Tm of the Type II ITD peak is >80oC. The height of the ITD peaks is proportional to the number of cells in the input sample which contain the ITD. In the minB assays (lower), the Tm for the WT and ITD peaks is similar and when the input contains a mix of WT and ITD templates, the peaks can merge into each other. The approximate boundaries between the WT and ITD peaks in the minB assays are indicated with a red line.

**Additional File 2: Clinical samples used in the study.**

**Additional File 3: PCR primers and PCR conditions.**

**Additional File 4: Using minB primers for ITD sequencing.** **(A)** In the minB qPCR assay with a standard input of 25ng of template, WT and ITD melt curves peaks merge into each other (using DNA from sample AM5 as an example). **(B - E)** At very low levels of template input (5 - 10pg; 5pg is roughly equivalent to the amount of DNA in a single diploid canine cell) in a minB qPCR reaction, WT and ITD templates can be partitioned into separate wells such that some wells contain only WT template and produce a pure WT peak (B), some wells contain only ITD template and produce a pure ITD peak (C) while some wells still contain a mix of templates and produce a mixed peak signal (D). Note that the height of the ITD peak compared to the WT in (D) is much greater than in the bulk reaction in (A), indicating that the ITD template is present in relatively greater abundance in this well than in (A) and has been at least partially purified. **(E)** Overlay of melt curve traces from (B), (C) and (D) for comparison. Importantly, if primer dimers are present, they can be seen as peaks with a Tm of approximately 72oC, (not shown) and therefore cannot be confused with either the WT or ITD peak. **(F)** Agarose gel electrophoresis size analysis of amplified fragments from the wells shown in (B) – (D). Half of the reaction volume from each well was loaded on the gel. Also included is the reaction mix from a well in which no amplification occurred (with an input of 5pg template per well, we only expect successful amplification in approximately 50 – 75% of wells). Product from wells in which a pure *KIT* exon 11 ITD peak is detected can be purified by a standard column PCR purification protocol and Sanger sequenced using minB forward and reverse primers. Uncropped gel image provided in **Additional File 22**.

**Additional File 5: Overview of AM tumour set.** H&E stained low-power whole slide images.

**Additional File 6: Detailed experimental results of analysis of clinical samples. Tab (A):** Ct and Tm values for minA analysis. For each sample, Ct mean and SD values are given, as well as the number of replicates in the assay. When an ITD was present there was a distinct peak and the Tm mean and SD values for these are provided. In some cases, the ITD peak was split into two and the software reported a Tm value for both these ITD peaks; in such cases, only the highest Tm value is reported. *None of the three replicates from AM8 or AM13 reached the amplification detection threshold. **Only two of three AM14 replicates reached the amplification detection threshold; mean±SD values from AM14 are based on only two samples. **Tab (B)** Melt curve peak ratios. Maximum derivative reporter values (‘strength of signal’) for each minA replicate for samples with both a WT (PdWT) and ITD (PdITD) peak, as well as the ratio values (PdITD/PdWT) for each replicate. **Tab (C)** Relative area of tumour compared to total tissue in H&E sections of each AM sample. Values are in square pixels as scales were not embedded in the whole slide image files used by QuPath. **Tab (D)** Results of KIT and Ki67 staining on tumour samples.

**Additional File 7: Confirmation of minA assay results on AM19. (A)** Repeat of AM19 whole exon 11 semi-quantitative PCR and additional semi-quantitative PCR analysis with minA and minB primers. Pattern of amplification products with all three primer sets is consistent with an exon 11 ITD (see also **Additional File 1**). Arrow indicates WT product, red bar indicates ITD products. A No Template control (NT) was run for each reaction. **(B)** qPCR melt curves for AM2 and AM19 analysed with minB primers. The single peak in AM2 with a Tm of 77.08±0.01 (mean±SD, n=3) is consistent with a WT *KIT* exon 11. The peak in AM19 at 81.41±0.06 (mean±SD, n=3) is consistent with an exon 11 ITD. Uncropped gel image provided in **Additional File 22**.

**Additional File 8: Alignment of exon 11 ITDs in AM tumour series.** Sequences are aligned to our reference wild type sequence (38). Longer sequences (AM6, AM9, AM15, AM16) were from Sanger sequencing of whole exon 11 amplicons isolated by gel extraction. Shorter sequences (AM3, AM5, AM19) were from Sanger sequencing of minB primer amplicons following qPCR (see **Additional File 4**). The identity of the SNP 672 allele in minB-amplified products cannot be definitively determined as the site is in the reverse minB primer binding site, and this creates a bias in the amplification product that may not reflect the real genotype. The identify of SNP 672 in AM9 could not be determined due to sequence quality. In these samples, the position of SNP 672 is indicated by ‘N’. Primer binding sites for minA and minB are indicated, as is the position of the exon 11 / intron 11 boundary.

**Additional File 9: FASTA sequences of *KIT* exon 11 ITDs shown in Additional File 8.**

**Additional File 10: Genotyping results.** Genotypes at SNP 619 in the WT sequence for each sample.

**Additional File 11: Determination of exon 11 status by the minA assay is not confounded by allelic variants.** qPCR melt curves for samples with C/T or T/T genotype, as well as No Template and MDCK controls, analysed using the alternative minA-ALT forward primer compared to the standard minA forward primer. Genotypes are shown on each melt curve. In this assay, there is a small peak in one out of three AM1 replicates with the minA primers; there are none with minA-ALT, which would be expected to be the more sensitive assay in this assay (as AM1 is a T/T genotype). There were no such peaks in the assay shown in **Figure 1B**. This peak is therefore interpreted as a false positive signal in that replicate well (see **Discussion** for comment on analytical sensitivity and specificity of the assay). No ITDs are detected in these samples with either minA or min-ALT, confirming that all these samples are WT.

**Additional File 12: The PdITD/PdWT ratio is proportional to the amount of tumour tissue in the sample. (A)** Low power H&E whole slide images of the seven AM tumours with *KIT* exon 11 ITDs. The areas measured by QuPath are outlined in red (tumour) and black (whole tissue) . Bar = 5mm. **(B)** Ratio of tumour tissue to total tissue area (determined from QuPath measurements) compared to ratio between the height of the ITD peak (PdITD) and the height of the WT peak (PdWT) in tumours in which an ITD was detected. Simple linear regression line shown (Prism). The line is significantly non-zero (P=0.0299). **(C)** Ratio of tumour tissue to total tissue area compared to PdITD/PdWT ratio including both AM tumour data and data from previous set of FFPE samples (38). The P value for the line is more strongly significantly non-zero (P=0.0046). See **Additional File 3** for tumour:tissue ratios and PdITD/PdWT data.

**Additional File 13:** **Limits of minA detection of Type I and Type II tumours with a constant ratio of template input.** qPCR melt curves for a series of quadruplicate reactions in which MDCK template was spiked with DNA from a Type I (AM16) or Type II (AM15) tumour at a constant ratio, 1/25 of the total, but with varying amounts of total template input into the reaction (25ng, 5ng, 1ng, 0.5ng). PdITD/PdWT ratios for each replicate as well as mean and SD.

**Additional File 14: Analysis of FNA samples by minA/minA-ALT assay.** qPCR melt curves for analysis of DNA isolated from FNA1, FNA2 (digit) and FNA3 (stifle), with a control MDCK curve for comparison. Mean Ct values (±SD) shown on each curve indicate the (very) low levels of input material (a Ct>40 cycles is usually considered an undetectable target). Indeed, while all samples were tested in quadruplicate, with the FNA1 minA-ALT assays, only three of the four replicates amplified above the detection threshold before 40 cycles.

**Additional File 15: Details of plasma samples analysed by minA assay. Tab (A)** gives a sample overview with estimated total body plasma volumes, and the amount of that volume calculated to be tested in each replicate. The percentage of the total circulating plasma volume is plotted against the mean Ct values for those samples in the graphs below, one with and one without the LVS2 samples. Simple linear regression with 95% confidence boundaries are shown. Closed circles are the first repeat for that sample, open circles are the second repeat. **Tabs (B) and (C)** give Ct values, Tm values for WT and (if present) ITD peaks, as well as PdWT and PdITD values and ratios for the LVS plasma samples **(B)** and plasma samples which had matched FNAs **(C)**.

**Additional File 16: Detection of the *KIT* exon 11 ITD in plasma from MCT cases (1).** qPCR melt curves from matched plasma samples from cases FNA1 and FNA4 and from first and second repeats of LVS1, LVS2A and LVS2B plasma sample. PdITD/PdWT ratios for all replicates, mean and SD values shown for all samples. There was no detection in FNA1, FNA4, LVS1 or the first LVS2 sample but strong ITD signal detection in both repeats of the second LVS2 sample (arrows) (see also **Figure 6**).

**Additional File 17: Detection of the *KIT* exon 11 ITD in plasma from MCT cases (2).** qPCR melt curves from first and second repeats of LVS3, LVS4, LVS5 and LVS6 plasma samples f. PdITD/PdWT ratios for all replicates, mean and SD values shown for all samples. See also **Figure 6.** There was no detection in LVS4. The LVS3 first repeat result (arrow) could be consistent with a low-level positive detection, based on the PdITD/PdWT mean±SD; the PdITD/PdWT mean±SD of the second repeat is equivocal and could be a false positive or a genuine detection at the limits of the assay sensitivity. The single ITD peak in one LVS5 replicate in one repeat (arrow) is also equivocal and could be a false positive or a genuine detection at the limits of the assay sensitivity. However, the lack of any other detectable ITD signal suggests a false positive. The single peak in the first LVS6 repeat (arrow) is equivocal but the LVS6 second repeat melt curves were consistent with a low level genuine positive detection (arrow) and sequencing supported the presence of an ITD (**Additional File 18**).

**Additional File 18: Analysis of LVS3 and LVS6 using low input minB/minB-ALT qPCR. (A)** Melt curves from minB/minB-ALT qPCR reactions on LVS3 cfDNA plasma eluates diluted 1:20. 17 out of 23 minB reactions showed WT peaks. 13 out of 24 minB-ALT reactions showed WT peaks; two showed only peaks consistent with primer dimers. No reactions showed either pure ITD peaks or mixed WT/ITD results (five examples of WT curves with mean Tm±SD shown for both minB and minB-ALT). **(B)** Melt curves from minB qPCR reactions on LVS6 cfDNA plasma eluates diluted 1:20. The majority of reactions (30/48) showed only WT peaks (left hand panel showing five examples of WT curves in green with mean Tm±SD for those curves). Two reactions showed mixed WT and ITD products (middle panel; blue curves). One reaction gave a single peak with a Tm (80.70oC) consistent with a pure ITD product (right hand panel, red). The melt curves are also shown combined for comparison. **(C)** Gel electrophoresis of representative wells from the diluted LVS6 reactions, showing size of products from reactions with WT or mixed-type melt curves, as well as the well with a pure ITD melt curves (red arrow) and the absence of product from a reaction in which no melt curve signal was detected. **(D)** The reaction which amplified the pure ITD was purified and sequenced and the structure of the ITD determined. The ITD has the structure of a Type I duplication, in which only the forward minA primer binding site has been duplicated. However, there is a T>C substitution at position 2 of the FminA binding site in the 3’ portion of the ITD (white arrow). Uncropped gel image provided in **Additional File 22**.

**Additional File 19: Analysis of LVS2 ITD using low input minB-ALT qPCR. (A)** Melt curves from minB-ALT qPCR reactions on LVS2B cfDNA plasma eluates diluted out 1:20. The majority of reactions (24/37) showed only WT peaks, in some cases with low Tm peaks indicating primer dimer amplification (left hand panel showing five examples in green; the mean Tm±SD for these five samples is indicated) or peaks with ‘shoulders’ which indicated mixed WT and ITD products (12/37; middle panel showing examples in blue). However, one reaction gave a single peak with a Tm (80.02oC) consistent with a pure ITD product (right hand panel, red). The melt curves are also shown combined for comparison. **(B)** Gel electrophoresis of representative wells from the diluted LVS2B reactions, showing size of products from reactions with WT or mixed-type melt curves, as well as the well with a pure ITD melt curves (red arrow and box). **(C)** The reaction which amplified the pure ITD was purified and sequenced and the structure of the ITD determined. Note the 6bp insertion in between the 5’ and 3’ duplicated regions, not previously seen in the samples in this study. Uncropped gel image provided in **Additional File 22**.

**Additional File 20: Relationship between ITD abundance and amount of starting template in determining the results of the minA assay. (A)** In a sample where the amount of template available for analysis is limited, and *KIT* exon 11 templates carrying an ITD are rare (indicated by red DNA molecules) compared to more abundant WT templates (black DNA molecules), the ITD targets are not evenly distributed (partitioned) between replicate reactions. Therefore, not all replicates may give an ITD signal and, if one or two do give a signal, it will be very difficult to be sure these are not false positives. Such a situation may occur when isolating cf/ctDNA from a small plasma sample if a cMCT with a *KIT* exon 11 ITD is present but only shedding small amounts of DNA into the circulation. **(B)** If the amount of template is limited but *KIT* exon 11 templates carrying an ITD are at a high concentration, then all replicates will contain ITD targets but the proportions may not be evenly distributed. Therefore, a strong ITD signal will be present in all replicates but signal variability may be high between replicates. Such a situation may occur when isolating cf/ctDNA from a small plasma sample if a cMCT with a *KIT* exon 11 ITD is present and shedding large amounts of DNA into the circulation. Alternatively, this scenario would also be consistent with an FNA sample taken directly from a tumour mass. **(C)** Starting with abundant template containing a small proportion of ITD targets results in a small but highly consistent ITD signal as the targets are evenly partitioned across the replicates to give a constant ratio of ITD to WT targets in all wells. This was the situation with FNA sampling of a lymph node contained metastatic cMCT cells. **(D)** An abundant amount of starting material containing a high proportion of cells with the ITD, as in direct analysis of FFPE samples from primary tumours, results in a strong, uniform ITD signal. Graphs used here to illustrate potential outcomes of the minA assay in different scenarios are from (A) Figure 4C, (B) Additional File 10 (LVS2B first repeat), (C) Figure 5C and (D) Figure 2B (AM16). Note that for Figure 4C, this is interpreted as a false positive reasons given in the text, however, a single genuinely positive low abundance signal would appear the same.

**Additional File 21: Detection of ITD peak in LV3 samples related to clinical behaviour of tumour.** Timeline of LVS2 treatment left-hand side, minA assay melt curves right hand side. Buffy coat DNA run alongside plasma-derived cfDNA showed only a WT peak at both timepoints. The first plasma cfDNA sample, in which an ITD could not be detected, was taken one month after treatment was switched from masitinib (specific for the *KIT* exon 11 ITD) to toceranib (a broad specificity kinase inhibitor). The second sample, taken 5 weeks later, was taken while the animal was still on toceranib and shows an ITD can now be detected. The amount of material input into each reaction is provided on the melt curve plots to demonstrate that there was comparable input into each ctDNA reaction at the two timepoints.

**Additional File 22: Uncropped gels from Figure 2, Figure 5, Additional File 4, Additional File 7, Additional File 18 and Additional File 19. (A)** Gel from Figure 2. **(B)** Gel from Figure 5. **(C)** Gel from Additional File 4. **(D)** Gel from Additional File 7. **(E)** Gel from Additional File 18. **(F)** Gel from Additional File 19.Cropped areas used in figures indicated with red boxes. As the labelling of the lanes partly obscures the gels in parts (B) and (F), these gels have been presented in duplicate, one image without and one image with the labels. The uncropped gels from Figure 5 **(B)** and Figure 19 **(F)** include samples from additional qPCR wells (in both cases in the upper half of the gel) run following qPCR reactions. The uncropped Figure 5 gel **(B)** includes in the upper half of the gel the results of two reactions with had 5pg of FNA4 template DNA as starting material. Both of these gave only WT bands. Similarly, the upper half of uncropped Additional File 19 gel **(F)** includes the results of electrophoresis of additional representative wells from minB low template sequencing reactions of LVS2B (all of which were reactions with mixed-type melt curves, apart from the No Template control).
