# Supplementary material
Source: Research Square preprint supplement (doi:10.21203/rs.3.rs-9403964/v1)
Supplement: Supplementary file 2 [file 2be46a3366cbd4de421d888b.xlsx]

## Sheet: (A)Plasma cfDNA sample overview
Sample	Breed	Sex	Estimated average weight for breed and sex (kg)1	Estimated circulating blood volume (mls)2	Estimated circulating plasma volume (mls)3	Plasma volume (ul)	% of circulating plasma collected	Eluate volume (ul)	First repeat				Second repeat				SNP 619 genotype
									Template per reaction (ul)	% of circulating plasma sampled per reaction	minA mean Ct	SD	Template per reaction (ul)	% of circulating plasma sampled per reaction	minA mean Ct	SD
FNA1	Golden retriever	FU	32.06	2885.4	1442.7	170	0.000117835	45	5	1.30927e-05	31.6261	0.130618	N/A	N/A	N/A	N/A	C/C
FNA4	Labrador retriever	MU	34.57	3111.3	1555.65	90	5.78536e-05	45	2.5	3.21409e-06	31.9845	0.372685	N/A	N/A	N/A	N/A	C/C
LVS1	Labrador retriever	MN	34.57	3111.3	1555.65	135	8.67804e-05	30	5	1.44634e-05	30.2185	0.0745127	3	8.67804e-06	30.0754	0.0332767	C/C
LVS2A	Pug	FN	8.12	730.8	365.4	280	0.000766284	30	5	0.000127714	27.4046	0.145681	3	7.66284e-05	27.4274	0.117232	C/C
LVS2B						200	0.000547345	30	5	9.12242e-05	29.855	0.138775	3	5.47345e-05	29.5859	0.107393	C/C
LVS3	Labrador retriever	ME	34.57	3111.3	1555.65	73	4.69257e-05	30	5	7.82095e-06	31.6023	0.131714	3	4.69257e-06	31.774	0.156115	C/C
LVS4	Staffordshire bull terrier cross	FN	19.01	1710.9	855.45	142	0.000165995	30	5	2.76658e-05	28.4323	0.0860188	3	1.65995e-05	28.6497	0.113747	C/C
LVS5	Nova Scotia duck-tolling retriever	MN	22.84	2055.6	1027.8	200	0.00019459	30	5	3.24317e-05	32.5908	0.0814323	3	1.9459e-05	32.7439	0.419765	C/T
LVS6	Labrador retriever cross	MN	34.57	3111.3	1555.65	333	0.000214058	30	5	3.56764e-05	28.7881	2.44687	3	2.14058e-05	30.1557	0.193828	C/C
1Based on VetCompass standard weights for breed_sex combinations as in Edmunds et al, 2021.
2Based on a circulating volume of 90mls blood / kilo
3Based on a packed cell volume of 50%
Crossbreed weights assumed to be that of named parent breed
					Simple linear regression of all samples, correlating percentage of circulating plasma tested with Ct values
					Closed circles indicate first repeats, open circles indicate second repeats.
					Simple linear regression excluding LVS2 samples, correlating percentage of circulating plasma tested with Ct values
					Closed circles indicate first repeats, open circles indicate second repeats.

## Sheet: (B) LVS sample details
First repeat
Sample	CT	Tm WT	Peak diff WT	Tm ITD	Peak diff ITD	PdITD/PdWT	Mean PdITD/PdWT	SD PdITD/PdWT
LVS1	30.1357	72.6881	0.905	77.85	0	0	0	0
	30.2396	72.6881	0.787	77.655	0	0
	30.2801	72.5907	0.771	N/A	0	0
LVS2A	27.4868	73.1751	0.733	N/A	0	0	0	0
	27.2364	73.0777	0.82	N/A	0	0
	27.4906	72.9803	0.859	N/A	0	0
LVS2B	29.6961	72.5907	0.858	78.1423	0.817	0.952214	0.843303	0.149364
	29.9523	72.5907	0.965	78.1423	0.873	0.904663
	29.9167	72.5907	0.838	78.0449	0.564	0.673031
LVS3	31.4533	72.6881	0.807	77.947	0.07	0.086741	0.046697	0.0437515
	31.6507	72.6881	0.806	77.85	0.043	0.0533499
	31.703	72.6881	0.795	N/A	0	0
LVS4	28.4352	72.9803	0.838	N/A	0	0	0	0
	28.3449	72.9803	0.804	N/A	0	0
	28.5169	72.9803	0.806	N/A	0	0
LVS5	32.509	72.5907	0.777	78.1423	0.137	0.176319	0.0587731	0.101798
	32.5914	72.5907	0.744	N/A	0	0
	32.6719	72.5907	0.734	N/A	0	0
LVS6	30.3196	72.8829	0.79	N/A	0	0	0.129957	0.225092
	25.9661	72.6881	0.849	78.7267	0.331	0.38987
	30.0785	72.7855	0.798	N/A	0	0
Second repeat
Sample	CT	Tm WT	Peak diff WT	Tm ITD	Peak diff ITD	PdITD/PdWT
LVS1	30.038	73.1858	1.056	N/A	0	0	0	0
	30.1017	73.1858	1.024	N/A	0	0
	30.0865	73.1858	1.017	N/A	0	0
LVS2A	27.3312	72.8934	1.066	N/A	0	0	0	0
	27.558	72.9909	0.941	N/A	0	0
	27.393	72.9909	1.036	N/A	0	0
LVS2B	29.462	72.406	1.031	77.8643	0.992	0.962173	0.945552	0.0284866
	29.6434	72.5035	1.019	77.9618	0.93	0.912659
	29.6522	72.5035	1.074	77.9618	1.033	0.961825
LVS3	31.7859	73.0883	0.988	N/A	0	0	0.0240913	0.0417274
	31.9239	73.0883	0.984	N/A	0	0
	31.6124	73.0883	1.008	78.2542	0.0728522	0.072274
LVS4	28.6323	73.1858	1.048	N/A	0	0	0	0
	28.5457	73.1858	1.004	N/A	0	0
	28.7712	73.1858	0.994	N/A	0	0
LVS5	33.1931	72.5035	0.864	N/A	0	0	0	0
	32.6769	72.601	0.94	N/A	0	0
	32.3616	72.6985	0.932	N/A	0	0
LVS6	30.259	73.0883	1.025	79.0339	0.118574	0.115682	0.0901084	0.0241375
	29.9321	73.1858	0.999	78.2542	0.0868327	0.0869196
	30.2759	73.0883	0.838	78.2542	0.0567525	0.0677238

## Sheet: (C) FNA matched plasma details
Sample	CT	Tm WT	Peak diff WT	Tm ITD	Peak diff ITD	PdITD/PdWT	Mean PdITD/PdWT	SD PdITD/PdWT
FNA1	31.582	72.4791	1	N/A	0	0	0	0
	31.5123	72.4791	1.013	N/A	0	0
	31.8142	72.4791	0.985	N/A	0	0
	31.596	72.5772	1.006	N/A	0	0
FNA4	31.616	72.6101	0.841	N/A	0	0	0	0
	32.5021	72.6101	0.802	N/A	0	0
	31.9401	72.7076	0.829	N/A	0	0
	31.8797	72.7076	0.849	N/A	0	0
