# Supplementary material
Source: Research Square preprint supplement (doi:10.21203/rs.3.rs-9403964/v1)

### A) Uncropped gel from Figure 2

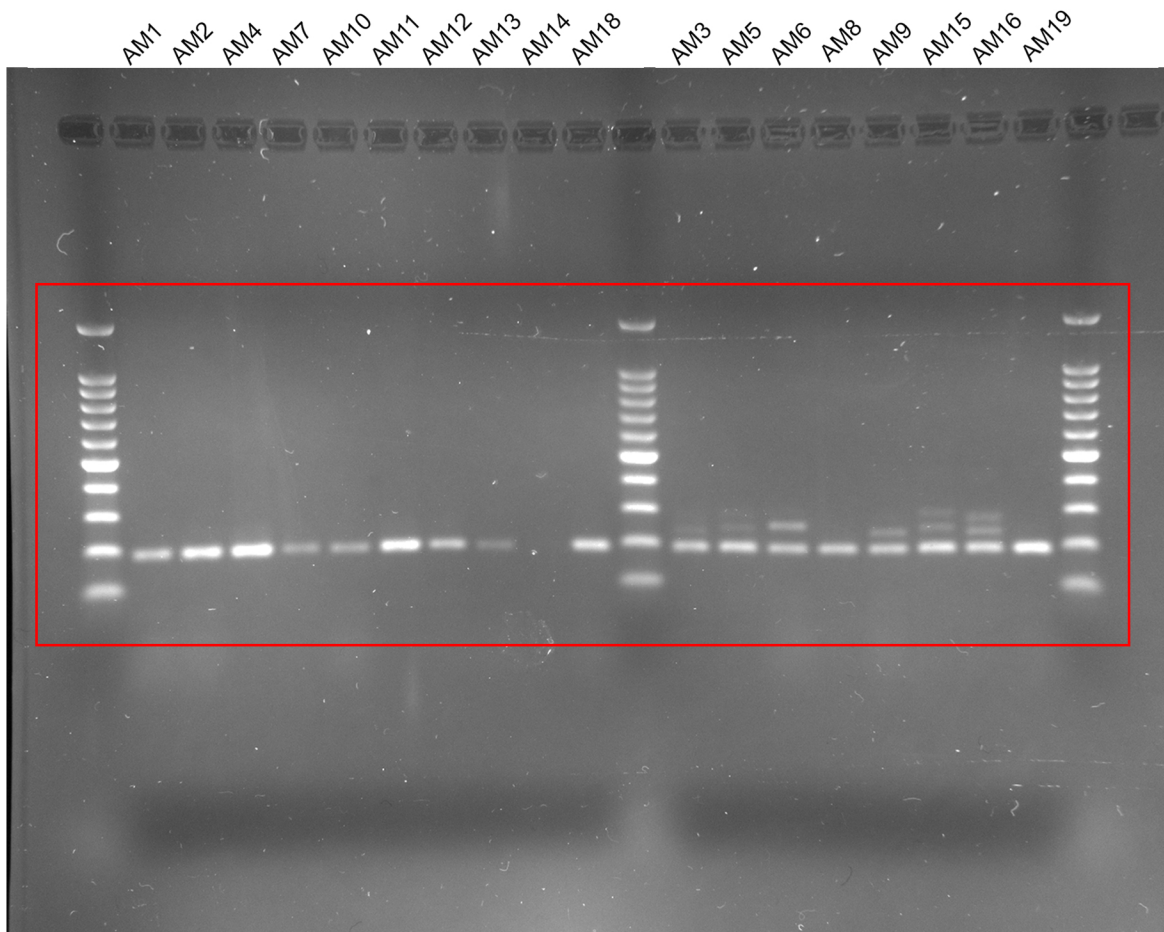

### B) Uncropped gel from Figure 5

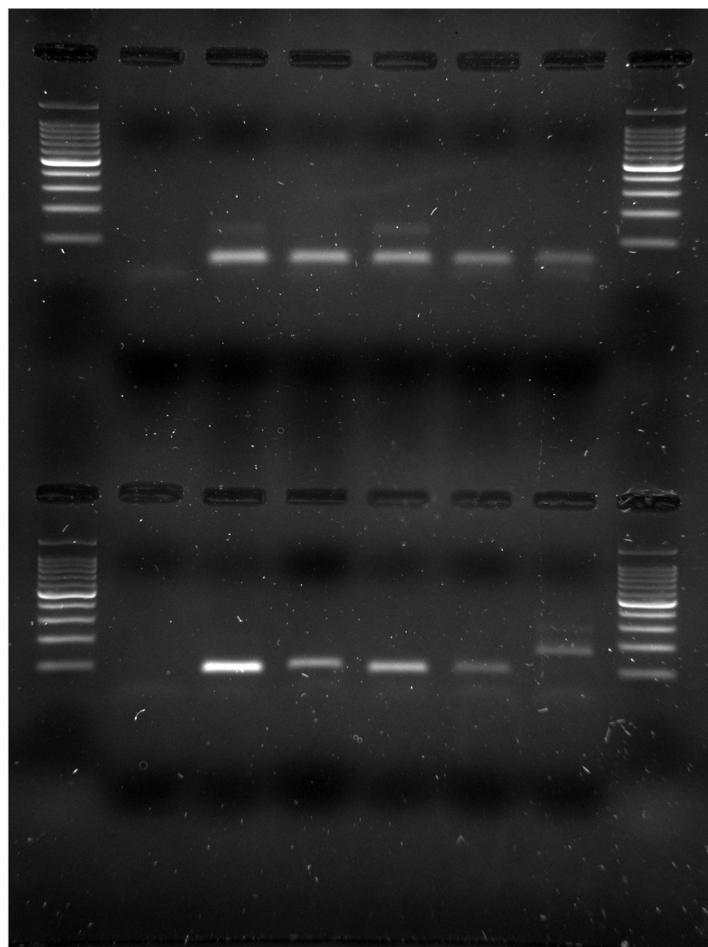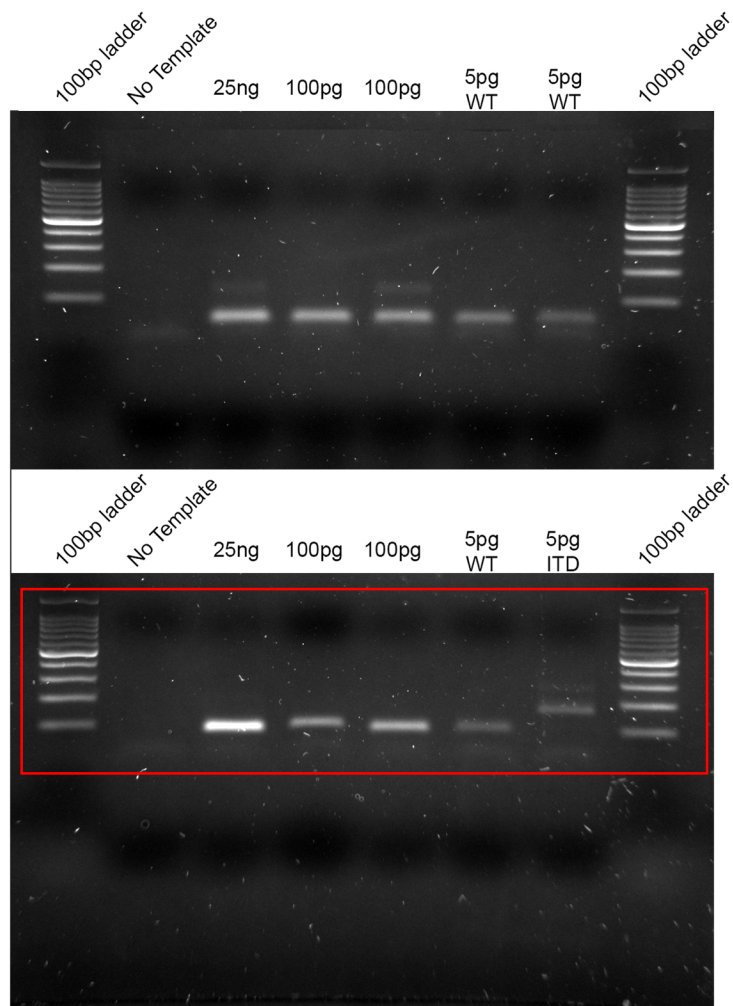

C) Uncropped gel from Additional File 4

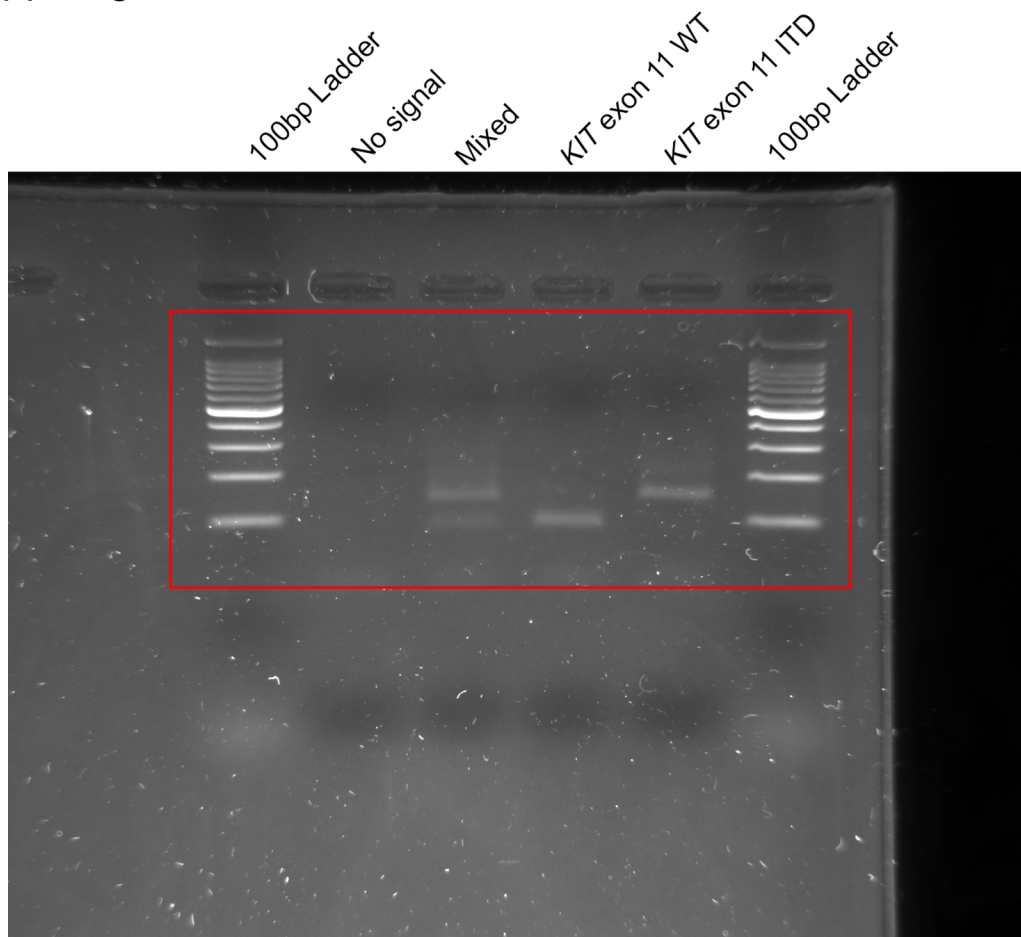

D) Uncropped gel from Additional File 7

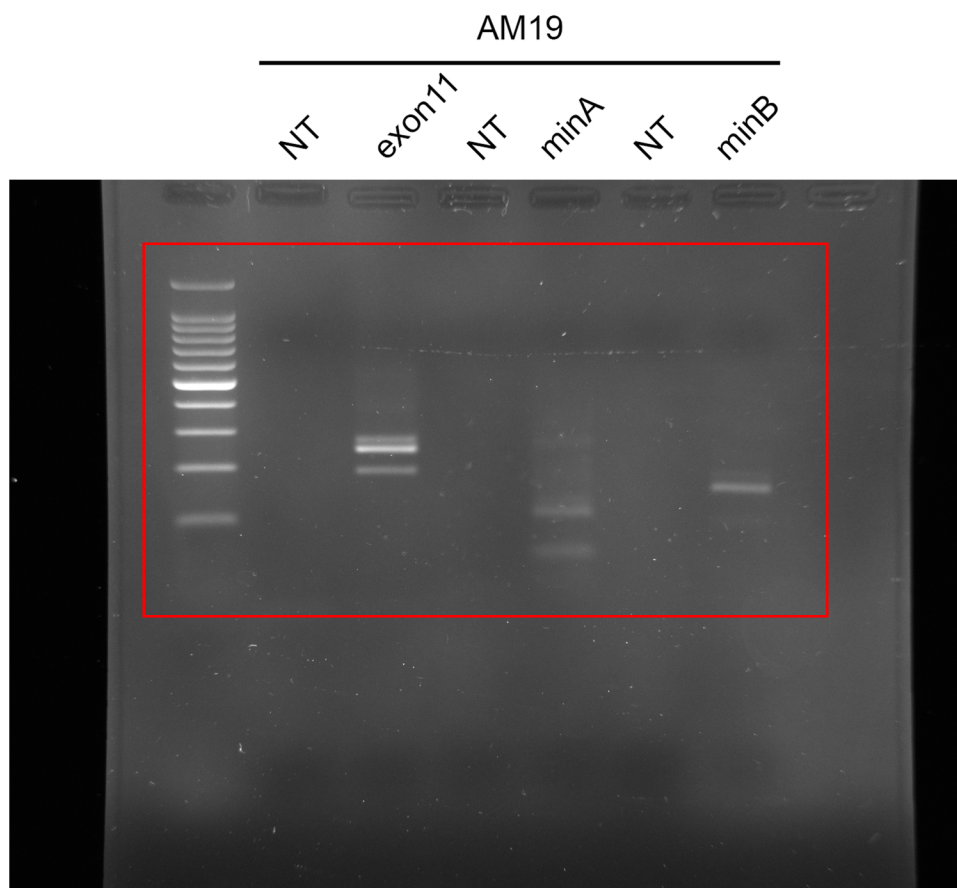

E) Uncropped gel from Additional File 18

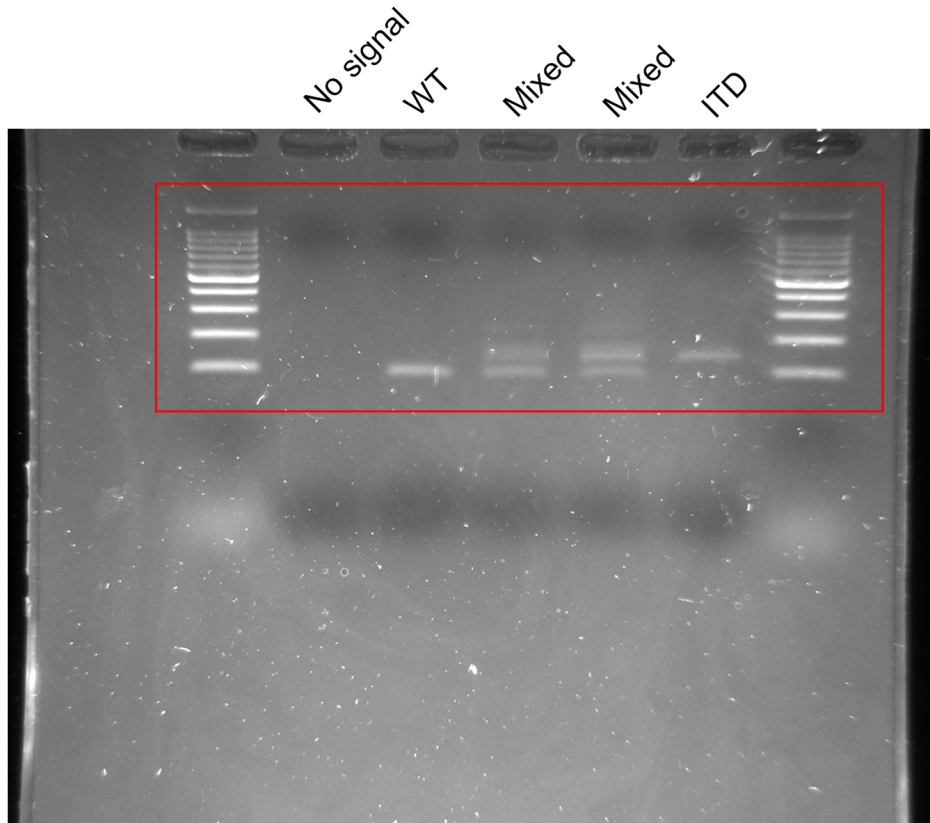

F) Uncropped gel from Additional File 19

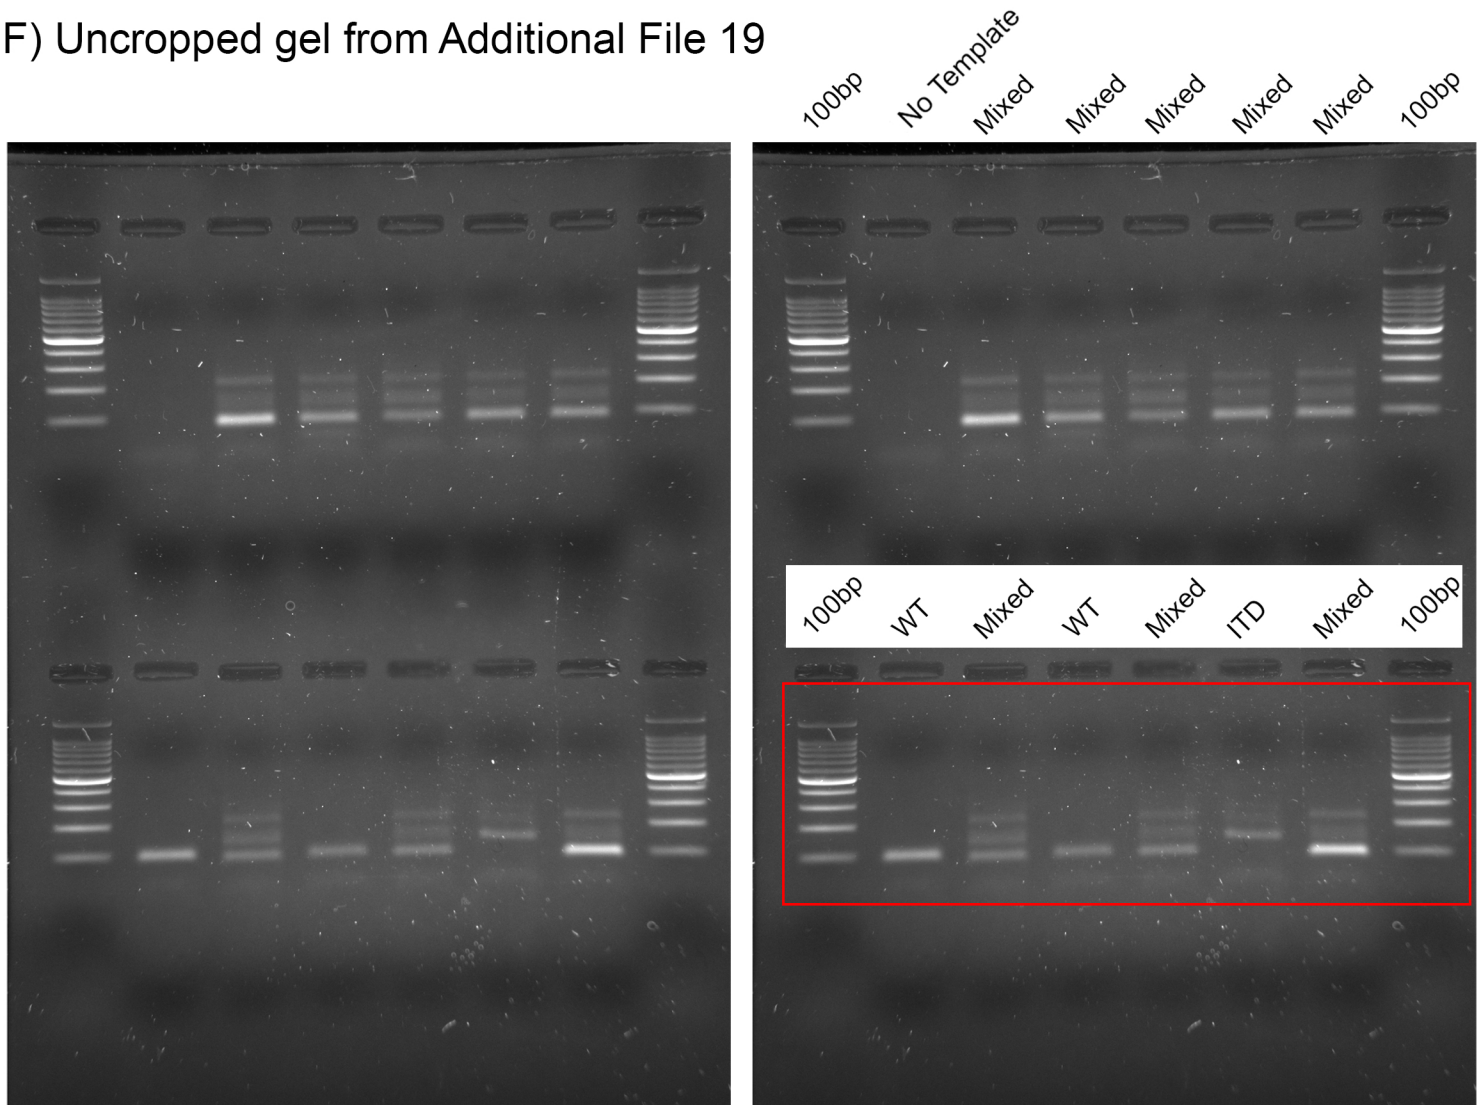

Supplement: Supplementary file 2 [file 6151492be941604cd203b7fe.pdf]
