# Supplementary material
Source: Research Square preprint supplement (doi:10.21203/rs.3.rs-9403964/v1)
Supplement: Supplementary file 3 [file 6470d03f93e0ee1324d2f16c.xlsx]

## Sheet: Assay primers
Name	Target	Sequence	Length	%GC	Expected wild type product
Exon 11F	NM_001003181 Canis lupus familiaris KIT, UU_Cfam_GSD_1.0/canFam4 chromosome 13 (47,940,537 - 47,940,559)	CCATGTATGAAGTACAGTGGAAG	23	0.43	189
Exon 11R	NM_001003181 Canis lupus familiaris KIT, UU_Cfam_GSD_1.0/canFam4 chromosome 13 (47,940,70 - 47,940,725)	GTTCCCTAAAGTCATTGTTACACG	24	0.42
FminA	NM_001003181 Canis lupus familiaris KIT, UU_Cfam_GSD_1.0/canFam4 chromosome 13 (47,940,611 - 47,940,631)	CTTCCTTACGATCACAAATGG	21	0.43	44
FminA-ALT	NM_001003181 Canis lupus familiaris KIT, UU_Cfam_GSD_1.0/canFam4 chromosome 13 (47,940,611 - 47,940,631)	CTTCCTTATGATCACAAATGG	21
RminA	NM_001003181 Canis lupus familiaris KIT, UU_Cfam_GSD_1.0/canFam4 chromosome 13 (47,940,632 - 47,940,654)	CTCAGCCTGTTTCTGGGAAACTC	23	0.52
FminB	NM_001003181 Canis lupus familiaris KIT, UU_Cfam_GSD_1.0/canFam4 chromosome 13 (47,940,590 - 47,940,610)	GTTTACATAGACCCAACACAG	21	0.43	88
RminB	NM_001003181 Canis lupus familiaris KIT, UU_Cfam_GSD_1.0/canFam4 chromosome 13 (47,940,655 - 47,940,677)	CCCCTATTTCATACTGACCAAAG	23	0.43
RminB-ALT	NM_001003181 Canis lupus familiaris KIT, UU_Cfam_GSD_1.0/canFam4 chromosome 13 (47,940,655 - 47,940,677)	CCCCTGTTTCATACTGACCAAAG	23

## Sheet: PCR reactions
Standard PCR
				Step	Temperature	Time
One reaction				1	94oC	2 minutes
Reagent	Amount (ul)			2	94oC	15 seconds	35 cycles
Water	22.8			3	58oC	30 seconds
5x Easy Green buffer	10			4	68oC	30 seconds
MgCl2 25mM	4			5	4oC	Hold
Primer 1F 10 uM	1
Primer 2R 10 uM	1
10 mM dNTPs	1
GoTaq	0.2
Template to 10 ul	10
Total	50
qPCR
			Stage	Step	Temperature	Time
One reaction			Hold	1	50oC	2 minutes
Reagent	Amount (ul)			2	95oC	2 minutes
2 x PowerUp SYBR Green Master Mix	10		Amplification	3	95oC	1 second	40 cycles
Primer 1F 10 uM	1			4	60oC	30 seconds
Primer 2R 10 uM	1		Melt curve	5	95oC	15 seconds
Template and water to 10 ul	8			6	60oC	1 minute
				7	Ramping of 0.05oC/s
Total	20			8	95oC	15 seconds
			Hold	9	4oC	Hold
			Ramping speed was 2.63oC/s up, 2.42oC down except during the melt curve readings
