# Supplementary material
Source: Research Square preprint supplement (doi:10.21203/rs.3.rs-9403964/v1)
Supplement: Supplementary file 4 [file ab1261ff9eb9991025e2067c.xlsx]

## Sheet: Samples
Sample	Type	Source	Breed	Sex_neuter status	Age at sampling (years)	Diagnosis
AM1	FFPE scrolls	AML1	Whippet	NK	10	Mast cell tumour, high grade (Patnaik and Kiupel); haired skin from nose.
AM2	FFPE scrolls	AML1	French bulldog	NK	8	Mast cell tumour, high grade (Patnaik and Kiupel); right axilla.
AM3	FFPE scrolls	AML1	Vizsla	NK	10	Mast cell tumour, high grade (Patnaik and Kiupel); right ear.
AM4	FFPE scrolls	AML1	Whippet	NK	<1	Mast cell tumour, high grade (Patnaik and Kiupel); haired skin from right hind.
AM5	FFPE scrolls	AML1	Labrador retriever	NK	8	Mast cell tumour, high grade (Patnaik and Kiupel); tail base mass
AM6	FFPE scrolls	AML1	French bulldog	NK	11	Mast cell tumour, high grade (Patnaik and Kiupel); right tarsus.
AM7	FFPE scrolls	AML1	American Staffordshire Terrier	NK	9	Mast cell tumour, high grade (Patnaik and Kiupel); haired skin.
AM8	FFPE scrolls	AML1	Pug	NK	9	Mast cell tumour, high grade (Patnaik and Kiupel); haired skin from left fore.
AM9	FFPE scrolls	AML1	Shih Tzu	NK	13	Mast cell tumour, high grade (Patnaik and Kiupel); right hind interdigital skin.
AM10	FFPE scrolls	AML1	American Staffordshire Terrier	NK	13	Mast cell tumour, high grade (Patnaik and Kiupel); left mammary glands.
AM11	FFPE scrolls	AML1	Labrador retriever	NK	9	Mast cell tumour, high grade (Patnaik and Kiupel); haired skin from right flank
AM12	FFPE scrolls	AML1	Shiba Inu	NK	7	Mast cell tumour, high grade (Patnaik and Kiupel); left knee.
AM13	FFPE scrolls	AML1	Labrador retriever	NK	12	Mast cell tumour, high grade (Patnaik and Kiupel); left thorax.
AM14	FFPE scrolls	AML1	Boxer	NK	13	Mast cell tumour, high grade (Patnaik and Kiupel); digit.
AM15	FFPE scrolls	AML1	Boxer	NK	13	Mast cell tumour, high grade (Patnaik and Kiupel); haired skin.
AM16	FFPE scrolls	AML1	Flat-coated retriever	NK	5	Mast cell tumour, high grade (Patnaik and Kiupel); haired skin from knee.
AM18	FFPE scrolls	AML1	French bulldog	NK	12	Mast cell tumour, high grade (Patnaik and Kiupel); haired skin from right hind.
AM19	FFPE scrolls	AML1	Labradoodle	NK	6	Mast cell tumour, high grade (Patnaik and Kiupel); haired skin.
LVS1	Buffy coat and EDTA plasma	LVS2	Labrador retriever	M_N	10	Mast cell tumour, high grade (Kiupel) / grade II (Patnaik); left flank.
LVS2	Buffy coat and EDTA plasma	LVS2	Pug	F_N	7	Mast cell tumour (by cytology); left tarsus.
LVS3	Buffy coat and EDTA plasma	LVS2	Labrador retriever	M_E	6	Mast cell tumour, low grade (Kiupel) / grade II (Patnaik); left muzzle.
LVS4	Buffy coat and EDTA plasma	LVS2	Staffordshire bull terrier cross	F_N	7	Mast cell tumour (by cytology, non-resectable); location not specified.
LVS5	Buffy coat and EDTA plasma	LVS2	Nova Scotia duck-tolling retriever	M_N	13	Mast cell tumour, high grade (Patnaik and Kiupel); haired skin from right metacarpus.
LVS6	Buffy coat and EDTA plasma	LVS2	Labrador retriever cross	M_N	7	Mast cell tumour, low grade (Kiupel) / grade II (Patnaik); haired skin from ventral abdomen.
FNA1	Fine needle aspirate, buffy coat and EDTA plasma	LVS2	Golden retriever	F_U	4	Mast cell tumour (by cytology); location not specified.
FNA2	Fine needle aspirate	LVS2	Chihuahua	M_N	6	Mast cell tumours (by cytology); digit (unspecified), pinna (unspecified).
FNA3	Fine needle aspirate	LVS2	Boxer	F_N	7	Mast cell tumours (by cytology); chin, left flank, right stifle.
FNA4	Fine needle aspirate, buffy coat and EDTA plasma	LVS2	Labrador retriever	M_U	Not known	Popliteal lymph node aspirate from animal with clinically diagnosed mast cell tumour, right hock; presence of neoplastic mast cells confirmed by cytology.
		1AML B.V., Antwerp, Belgium
		2Langford Small Animal Referral Hospital, University of Bristol, Langford, UK
