# Supplementary material
Source: Research Square preprint supplement (doi:10.21203/rs.3.rs-9403964/v1)
Supplement: Supplementary file 5 [file cee817296163d1b7c03d455a.xlsx]

## Sheet: Sheet1
Sample	Germline / WT	KIT exon 11 status	ITD
	47,940,619 genotype		47,940,619 genotype
AM1	HOM T/T	WT	NA
AM2	HOM C/C	WT	NA
AM3	HOM C/C	ITD	C
AM4	HOM C/C	WT	NA
AM5	HOM C/C	ITD	C
AM6	HOM C/C	ITD	C
AM7	HET C/T	WT	NA
AM8	HET C/T	WT	NA
AM9	HOM C/C	ITD	C
AM10	HET C/T	WT	NA
AM11	HOM C/C	WT	NA
AM12	HOM C/C	WT	NA
AM13	HOM C/C	WT	NA
AM15	HOM C/C	ITD	C
AM16	HOM C/C	ITD	C
AM18	HOM C/C	WT	NA
AM19	HOM C/C	ITD	C
