# Supplementary material
Source: Research Square preprint supplement (doi:10.21203/rs.3.rs-9403964/v1)
Supplement: Supplementary file 6 [file f5ab4a60494c792485645107.xlsx]

## Sheet: A) minA qPCR data
minA
Sample	Ct mean	CT SD	Melting curves				n
			Tm WT mean (oC)	Tm WT SD (oC)	Tm ITD mean (oC)	Tm ITD SD (oC)
AM1	32.1302	0.252086	72.5748	0.056307	N/A	N/A	3
AM2	25.6663	0.0568649	72.8024	0	N/A	N/A	3
AM3	25.3747	0.0320078	72.7666	0.0562982	78.9746	0.0562982	3
AM4	24.2388	0.0325842	72.9616	0.0562938	N/A	N/A	3
AM5	25.5842	0.179897	72.0515	0.0562982	79.0721	0.112592	3
AM6	24.5151	0.0180251	72.0872	0.056307	82.2952	0.0563114	3
AM7	27.3699	0.135649	73.1241	0.0562938	N/A	N/A	3
AM8	N/A	N/A	N/A	N/A	N/A	N/A	3*
AM9	25.4498	0.037981	72.4123	0	78.0364	0.056307	3
AM10	29.0664	0.183071	72.8024	0	N/A	N/A	3
AM11	25.4806	0.0525198	72.7016	0.0975075	N/A	N/A	3
AM12	27.3185	0.0574815	72.6041	0	N/A	N/A	3
AM13	N/A	N/A	N/A	N/A	N/A	N/A	3*
AM14	38.27	1.22	72.068	0.07	N/A	N/A	3**
AM15	23.5746	0.0457217	72.1165	0	82.3548	0.0975113	3
AM16	24.7734	0.118843	72.6041	0	78.357	0	3
AM18	25.8454	0.0634801	72.9324	0.056307	N/A	N/A	3
AM19	24.1313	0.041029	72.2823	0.0563114	80.28	0.056307	3

## Sheet: B) Melt curve peak ratios
minA
Sample	Melting curves
	Tm WT (oC)	PdWT	Tm ITD (oC)	PdITD	PdITD / PdWT	Ratio mean	Ratio SD
AM3	72.799	1.02948	78.942	0.548184	0.532487	0.549095	0.0143941
	72.702	1.01413	78.942	0.565836	0.557954	0.549095	0.0143941
	72.799	0.99652	79.04	0.554908	0.556846	0.549095	0.0143941
AM5	72.019	0.873428	79.137	1.04495	1.19637	1.07302	0.136748
	72.117	0.896419	79.137	0.983119	1.09672	1.07302	0.136748
	72.019	0.941146	78.942	0.871475	0.925972	1.07302	0.136748
AM6	72.12	0.503993	82.36	1.18819	2.35756	2.34938	0.0522273
	72.12	0.472367	82.263	1.13228	2.39704	2.34938	0.0522273
	72.022	0.508592	82.263	1.16648	2.29355	2.34938	0.0522273
AM9	72.412	1.05261	78.069	0.918417	0.872511	0.854824	0.0326724
	72.412	1.01583	78.069	0.888687	0.874841	0.854824	0.0326724
	72.412	1.00962	77.971	0.824985	0.817122	0.854824	0.0326724
AM15	72.117	0.555884	82.257	1.22508	2.20383	2.27767	0.0680221
	72.117	0.530858	82.355	1.21639	2.29137	2.27767	0.0680221
	72.117	0.521748	82.452	1.21974	2.33779	2.27767	0.0680221
AM16	72.604	1.05048	78.357	1.06291	1.01182	1.01828	0.016364
	72.604	1.03555	78.357	1.07375	1.03689	1.01828	0.016364
	72.604	1.08431	78.357	1.09096	1.00613	1.01828	0.016364
AM19	72.217	0.770578	80.215	1.1095	1.43983	1.41734	0.0342695
	72.315	0.794069	80.312	1.09414	1.3779	1.41734	0.0342695
	72.315	0.794973	80.312	1.14022	1.43429	1.41734	0.0342695

## Sheet: C) Tissue area
Sample	Tumour area (sq.pixels)	Total tissue area (sq.pixels)	Tumour : tissue ratio
AM1	268442	302157	0.888419
AM2	100126	120912	0.82809
AM3	111927	305176	0.366762
AM4	317001	340893	0.929913
AM5	43238	266979	0.161953
AM6	345903	393982	0.877967
AM7	295670	478738	0.617603
AM8	ND	ND	ND
AM9	87453	162756	0.537326
AM10	130659	750736	0.174041
AM11	146559	221458	0.661791
AM12	51679	206808	0.249889
AM13	ND	ND	ND
AM14	ND	ND	ND
AM15	342074	371733	0.920214
AM16	77634	475948	0.163114
AM18	54669	391373	0.139685
AM19	283057	387588	0.730304

## Sheet: D) KIT and Ki67
Sample	Kiupel grade (High/Low)	c-KIT staining pattern	Number of Ki67 +ve nuclei	Total nuclei counted	% Ki67+ve nuclei	ITD status
AM1	High	II	45	933	4.82	WT
AM2	High	III	105	901	11.65	WT
AM3	High	III	64	856	7.48	ITD
AM4	High	III	39	887	4.39	WT
AM5	High	III	100	714	14.01	ITD
AM6	High	III	59	573	10.3	ITD
AM7	High	III	450	920	48.91	WT
AM9	High	III	71	913	7.78	ITD
AM10	High	III	42	652	6.44	WT
AM11	High	III	74	874	8.47	WT
AM12	High	II	38	576	6.6	WT
AM15	High	III	32	746	4.29	ITD
AM16	High	III	61	755	8.08	ITD
AM18	High	III	104	1020	10.2	WT
AM19	High	III	318	1208	26.32	ITD
